# Supplementary material for: Phase II Study of Personalized Peptide Vaccination with Both a Hepatitis C Virus-Derived Peptide and Peptides from Tumor-Associated Antigens for the Treatment of HCV-Positive Advanced Hepatocellular Carcinoma Patients
Source: Hindawi journal article supplement (doi:10.1155/2015/473909), 2015-01-01
Supplement: f1 [file 473909.f1.pdf]

**Supplementary Table 1. Peptides from tumor-associated antigens**

| Symbol for peptide | Protein       | Position of peptide | Amino acid sequence | HLA type               |
|--------------------|---------------|---------------------|---------------------|------------------------|
| CypB-129           | Cyclophilin B | 129-138             | KLKHYGPGWV          | A2, A3sup <sup>a</sup> |
| Lck-246            | p56Lck        | 246-254             | KLVERLGAA           | A2                     |
| Lck-422            | p56Lck        | 422-430             | DVWSFGILL           | A2, A3sup              |
| MAP-432            | ppMAPkkk      | 432-440             | DLLSHAFFA           | A2, A26                |
| WHSC2-103          | WHSC2         | 103-111             | ASLDSDPWV           | A2, A3sup, A26         |
| HNRPL-501          | HNRPL         | 501-510             | NVLHFFNAPL          | A2, A26                |
| UBE-43             | UBE2V         | 43-51               | RLQEWCSVI           | A2                     |
| UBE-85             | UBE2V         | 85-93               | LIADFLSGL           | A2                     |
| WHSC2-141          | WHSC2         | 141-149             | ILGELREKV           | A2                     |
| HNRPL-140          | HNRPL         | 140-148             | ALVEFEDVL           | A2                     |
| SART3-302          | SART3         | 302-310             | LLQAEAPRL           | A2                     |
| SART3-309          | SART3         | 309-317             | RLAEYQAYI           | A2                     |
| SART2-93           | SART2         | 93-101              | DYSARWNEI           | A24                    |
| SART3-109          | SART3         | 109-118             | VYDYNCHVDL          | A24, A3sup, A26        |
| Lck-208            | p56Lck        | 208-216             | HYTNASDGL           | A24                    |
| PAP-213            | PAP           | 213-221             | LYCESVHNF           | A24                    |
| PSA-248            | PSA           | 248-257             | HYRKWIKDTI          | A24                    |
| EGFR-800           | EGF-R         | 800-809             | DYVREHKDNI          | A24                    |
| MRP3-503           | MRP3          | 503-511             | LYAWEPSFL           | A24                    |
| MRP3-1293          | MRP3          | 1293-1302           | NYSVRYRPGL          | A24                    |
| SART2-161          | SART2         | 161-169             | AYDFLYNYL           | A24                    |
| Lck-486            | p56Lck        | 486-494             | TFDYLRSVL           | A24                    |
| Lck-488            | p56Lck        | 488-497             | DYLRSVLEDF          | A24                    |
| PSMA-624           | PSMA          | 624-632             | TYSVSFDSL           | A24                    |
| EZH2-735           | EZH2          | 735-743             | KYVGIEREM           | A24                    |
| PTHrP-102          | PTHrP         | 102-111             | RYLTQETNKV          | A24                    |
| SART3-511          | SART3         | 511-519             | WLEYYNLER           | A3sup                  |
| SART3-734          | SART3         | 734-742             | QIRPIFSNR           | A3sup                  |
| Lck-90             | p56Lck        | 90-99               | ILEQSGEWWK          | A3sup                  |
| Lck-449            | p56Lck        | 449-458             | VIQNLERGYR          | A3sup                  |
| PAP-248            | PAP           | 248-257             | GIHKQKEKSR          | A3sup                  |

<sup>a</sup>A3sup; HLA-A3 supertype (A3, A11, A31, and A33)

**Supplementary Table 2. Immune responses, tumor markers, and overall survival**

| Patient No. | Peptide <sup>a</sup> | IgG response <sup>b</sup> |              | CTL response <sup>c</sup> |             | CTL response to CEF <sup>c</sup> |             | AFP <sup>d</sup> |            | DCP <sup>d</sup> |             | OS (days) |
|-------------|----------------------|---------------------------|--------------|---------------------------|-------------|----------------------------------|-------------|------------------|------------|------------------|-------------|-----------|
|             |                      | Before                    | After        | Before                    | After       | Before                           | After       | Before           | After      | Before           | After       |           |
| 1           | C-35                 | 7250                      | 7768         | 0                         | <u>679</u>  |                                  |             |                  |            |                  |             |           |
|             | Lck-208              | 98                        | 0            | 0                         | 0           | 0                                | 0           | 3479             | <u>671</u> | 874              | <u>583</u>  | 141       |
|             | PAP-213              | 176                       | 0            | 0                         | 0           |                                  |             |                  |            |                  |             |           |
|             | PTHrP-102            | 84                        | 0            | 0                         | <u>1311</u> |                                  |             |                  |            |                  |             |           |
| 2           | C-35                 | 16547                     | 14532        | 0                         | <u>130</u>  |                                  |             |                  |            |                  |             |           |
|             | Lck-208              | 12                        | 0            | 0                         | 0           | 0                                | 0           | 774              | 901        | 1820             | 1820        | 295       |
|             | PAP-213              | 25                        | 18           | 0                         | 0           |                                  |             |                  |            |                  |             |           |
|             | PTHrP-102            | 33                        | 0            | 0                         | 0           |                                  |             |                  |            |                  |             |           |
| 3           | C-35                 | 8959                      | <u>22289</u> | 0                         | 0           |                                  |             |                  |            |                  |             |           |
|             | Lck-246              | 214                       | <u>6989</u>  | 0                         | 0           | 0                                | 0           | 49               | <u>17</u>  | 15300            | 20800       | 107       |
|             | CypB-129             | 153                       | 171          | 0                         | 0           |                                  |             |                  |            |                  |             |           |
|             | WHSC2-141            | 22                        | 20           | 0                         | 0           |                                  |             |                  |            |                  |             |           |
| 4           | C-35                 | 44                        | <u>106</u>   | 0                         | 0           |                                  |             |                  |            |                  |             |           |
|             | Lck-208              | 37                        | 16           | 0                         | 0           | 0                                | 0           | 13300            | 15700      | 20008            | <u>5326</u> | 210       |
|             | PSMA-624             | 30                        | <u>73</u>    | 0                         | 0           |                                  |             |                  |            |                  |             |           |
|             | PAP-213              | 26                        | <u>711</u>   | 0                         | 0           |                                  |             |                  |            |                  |             |           |
| 5           | C-35                 | 19100                     | 19828        | 0                         | <u>1407</u> |                                  |             |                  |            |                  |             |           |
|             | CypB-129             | 330                       | 315          | 0                         | 0           | 899                              | <u>1477</u> | 238              | 409        | 2600             | 49800       | 124       |
|             | UBE2V-43             | 39                        | 55           | 0                         | <u>698</u>  |                                  |             |                  |            |                  |             |           |
|             | HNRPL-140            | 270                       | 263          | 0                         | 0           |                                  |             |                  |            |                  |             |           |
| 6           | C-35                 | 14375                     | NA           | 0                         | NA          |                                  |             |                  |            |                  |             |           |
|             | HNRPL-501            | 713                       | NA           | 0                         | NA          | 0                                | NA          | 2688             | NA         | 7861             | NA          | 76        |
|             | ppMAPkkk-432         | 385                       | NA           | 0                         | NA          |                                  |             |                  |            |                  |             |           |
|             | WHSC2-103            | 98                        | NA           | 0                         | NA          |                                  |             |                  |            |                  |             |           |
| 7           | C-35                 | 3413                      | 3208         | 0                         | 0           |                                  |             |                  |            |                  |             |           |
|             | MRP3-1293            | 259                       | 270          | 0                         | 0           | 3063                             | <u>4658</u> | 5480             | 6130       | 40900            | 45400       | 106       |
|             | Lck-488              | 272                       | 289          | 0                         | 0           |                                  |             |                  |            |                  |             |           |
|             | SART2-93             | 173                       | 278          | 0                         | 0           |                                  |             |                  |            |                  |             |           |
| 8           | C-35                 | 22945                     | 24550        | 0                         | <u>803</u>  |                                  |             |                  |            |                  |             |           |
|             | SART2-93             | 148                       | 153          | 0                         | 0           | 0                                | 0           | 151              | 320        | 384              | 4055        | 159       |
|             | Lck-488              | 135                       | <u>3924</u>  | 0                         | <u>79</u>   |                                  |             |                  |            |                  |             |           |



|    |              |       |              |     |             |      |             |      |           |        |            |     |
|----|--------------|-------|--------------|-----|-------------|------|-------------|------|-----------|--------|------------|-----|
|    | Lck-486      | 1340  | 1143         | 0   | 0           |      |             |      |           |        |            |     |
| 18 | C-35         | 15844 | 16666        | 0   | <u>399</u>  |      |             |      |           |        |            |     |
|    | SART3-302    | 3177  | <u>24118</u> | 0   | 0           | 722  | <u>1730</u> | 616  | 1779      | 12     | 39         | 129 |
|    | Lck-246      | 1341  | 1070         | 0   | 0           |      |             |      |           |        |            |     |
|    | UBE2V-43     | 107   | <u>15917</u> | 0   | 0           |      |             |      |           |        |            |     |
| 19 | C-35         | 23316 | 23405        | 0   | <u>1506</u> |      |             |      |           |        |            |     |
|    | HNRPL-140    | 398   | 332          | 0   | 0           | 5167 | <u>9082</u> | 104  | 184       | 51305  | 303630     | 155 |
|    | WHSC2-103    | 295   | 238          | 0   | 0           |      |             |      |           |        |            |     |
|    | SART3-302    | 211   | 206          | 0   | 0           |      |             |      |           |        |            |     |
| 20 | C-35         | 19281 | 18608        | 0   | 0           | 0    | <u>680</u>  | 49   | 106       | 3300   | 8940       | 300 |
|    | WHSC2-103    | 73    | 39           | 0   | 0           |      |             |      |           |        |            |     |
| 21 | C-35         | 15075 | 14541        | 185 | 0           |      |             |      |           |        |            |     |
|    | PSA-248      | 7774  | <u>20174</u> | 0   | 0           | 0    | <u>192</u>  | 38   | <u>34</u> | 77     | 972        | 345 |
|    | SART3-109    | 7677  | 12448        | 0   | <u>229</u>  |      |             |      |           |        |            |     |
|    | SART2-93     | 439   | 565          | 0   | 0           |      |             |      |           |        |            |     |
| 22 | C-35         | 15237 | NA           | 0   | NA          |      |             |      |           |        |            |     |
|    | MRP3-1293    | 201   | NA           | 0   | NA          | 0    | NA          | 498  | NA        | 294280 | NA         | 56  |
|    | PAP-213      | 151   | NA           | 0   | NA          |      |             |      |           |        |            |     |
|    | SART2-93     | 91    | NA           | 0   | NA          |      |             |      |           |        |            |     |
| 23 | C-35         | 7638  | 7156         | 0   | <u>193</u>  |      |             |      |           |        |            |     |
|    | Lck-488      | 4385  | 4409         | 0   | <u>163</u>  | 0    | 0           | 2256 | 7040      | 33300  | 73100      | 145 |
|    | MRP3-1293    | 1712  | 3065         | 0   | 0           |      |             |      |           |        |            |     |
|    | SART2-93     | 1009  | 863          | 0   | 0           |      |             |      |           |        |            |     |
| 24 | C-35         | 25860 | 25691        | 0   | 0           |      |             |      |           |        |            |     |
|    | SART3-302    | 16190 | 14802        | 0   | 0           | 1911 | <u>2846</u> | 14   | <u>10</u> | 27900  | <u>207</u> | 154 |
|    | HNRPL-501    | 51    | <u>703</u>   | 0   | <u>745</u>  |      |             |      |           |        |            |     |
|    | WHSC2-103    | 48    | 78           | 0   | <u>495</u>  |      |             |      |           |        |            |     |
| 25 | C-35         | 8775  | 15107        | 0   | <u>92</u>   |      |             |      |           |        |            |     |
|    | SART3-109    | 11666 | 11650        | 0   | 0           | 0    | 0           | 225  | 796       | 3101   | 26466      | 164 |
|    | Lck-486      | 2430  | 2362         | 0   | 0           |      |             |      |           |        |            |     |
|    | SART2-93     | 199   | <u>8252</u>  | 0   | <u>685</u>  |      |             |      |           |        |            |     |
| 26 | C-35         | 12393 | 9983         | 0   | <u>71</u>   | 340  | <u>470</u>  | 1880 | 2880      | 972    | 2540       | 237 |
|    | SART3-734    | 1336  | 1491         | 0   | 0           |      |             |      |           |        |            |     |
| 27 | C-35         | 1585  | 1312         | 0   | 0           |      |             |      |           |        |            |     |
|    | Lck-246      | 378   | 292          | 0   | 0           | 2087 | 1007        | 254  | 281       | 53     | <u>22</u>  | 209 |
|    | ppMAPkkk-432 | 134   | 110          | 0   | 0           |      |             |      |           |        |            |     |

|    |              |       |              |    |             |      |             |      |           |        |              |                  |
|----|--------------|-------|--------------|----|-------------|------|-------------|------|-----------|--------|--------------|------------------|
|    | WHSC2-103    | 122   | 113          | 0  | 0           |      |             |      |           |        |              |                  |
| 28 | C-35         | 36436 | 36269        | 0  | 0           |      |             |      |           |        |              |                  |
|    | SART3-511    | 488   | 529          | 80 | 0           | 0    | 0           | 48   | <u>36</u> | 437    | 835          | 481 <sup>e</sup> |
|    | SART3-734    | 132   | 185          | 0  | 0           |      |             |      |           |        |              |                  |
| 29 | C-35         | 37661 | NA           | 0  | NA          |      |             |      |           |        |              |                  |
|    | SART3-109    | 1130  | NA           | 0  | NA          | 0    | NA          | 10   | NA        | 3950   | NA           | 58               |
|    | Lck-488      | 312   | NA           | 0  | NA          |      |             |      |           |        |              |                  |
|    | SART2-93     | 251   | NA           | 0  | NA          |      |             |      |           |        |              |                  |
| 30 | C-35         | 37657 | 40695        | 0  | <u>364</u>  |      |             |      |           |        |              |                  |
|    | SART2-93     | 173   | 285          | 0  | 0           | 869  | <u>1401</u> | 5413 | 8253      | 248    | <u>179</u>   | 483 <sup>e</sup> |
|    | SART3-109    | 162   | <u>1713</u>  | 0  | 0           |      |             |      |           |        |              |                  |
|    | Lck-488      | 101   | <u>249</u>   | 0  | 0           |      |             |      |           |        |              |                  |
| 31 | C-35         | 20059 | 19527        | 0  | <u>1288</u> |      |             |      |           |        |              |                  |
|    | WHSC2-141    | 44    | 63           | 0  | 0           | 0    | 0           | 4636 | 9313      | 17168  | 56666        | 245              |
|    | CypB-129     | 41    | 41           | 0  | 0           |      |             |      |           |        |              |                  |
|    | Lck-246      | 38    | 40           | 0  | 0           |      |             |      |           |        |              |                  |
| 32 | C-35         | 42340 | 42650        | 0  | <u>1132</u> |      |             |      |           |        |              |                  |
|    | Lck-488      | 259   | 440          | 0  | <u>105</u>  | 3396 | 2213        | 544  | 990       | 21749  | <u>2394</u>  | 186              |
|    | PAP-213      | 209   | <u>48434</u> | 0  | <u>490</u>  |      |             |      |           |        |              |                  |
|    | SART2-93     | 186   | <u>398</u>   | 0  | <u>268</u>  |      |             |      |           |        |              |                  |
| 33 | C-35         | 26949 | 26521        | 0  | 0           |      |             |      |           |        |              |                  |
|    | MRP3-1293    | 192   | 86           | 0  | 0           | 0    | 0           | 9    | 5         | 82250  | 145755       | 69               |
|    | SART2-93     | 107   | 108          | 0  | 0           |      |             |      |           |        |              |                  |
|    | PSA-248      | 86    | 149          | 0  | 0           |      |             |      |           |        |              |                  |
| 34 | C-35         | 38919 | 38897        | 0  | 0           |      |             |      |           |        |              |                  |
|    | ppMAPkkk-432 | 721   | 765          | 0  | 0           | 2602 | <u>3790</u> | 1476 | 1288      | 162110 | <u>85920</u> | 517 <sup>e</sup> |
|    | Lck-246      | 248   | 281          | 0  | 0           |      |             |      |           |        |              |                  |
|    | HNRPL-140    | 248   | 226          | 0  | 0           |      |             |      |           |        |              |                  |
| 35 | C-35         | 32171 | 32810        | 0  | <u>236</u>  |      |             |      |           |        |              |                  |
|    | Lck-90       | 359   | 367          | 0  | 0           | 0    | 0           | 28   | <u>22</u> | 11     | 8            | 374              |
|    | Lck-449      | 173   | 164          | 0  | <u>1090</u> |      |             |      |           |        |              |                  |
|    | SART3-734    | 154   | 152          | 0  | 0           |      |             |      |           |        |              |                  |
| 36 | C-35         | 17909 | 28156        | 0  | <u>901</u>  |      |             |      |           |        |              |                  |
|    | PAP-213      | 388   | <u>19613</u> | 0  | <u>710</u>  | 1795 | <u>3994</u> | 53   | 746       | 11     | 14           | 324              |
|    | SART2-93     | 479   | 445          | 0  | <u>466</u>  |      |             |      |           |        |              |                  |
|    | PSMA-624     | 223   | <u>1039</u>  | 0  | 0           |      |             |      |           |        |              |                  |

|    |           |       |              |    |            |      |             |        |           |       |      |                  |  |
|----|-----------|-------|--------------|----|------------|------|-------------|--------|-----------|-------|------|------------------|--|
| 37 | C-35      | 38207 | 38310        | 0  | 0          |      |             |        |           |       |      |                  |  |
|    | Lck-488   | 185   | 130          | 0  | 0          |      |             |        |           |       |      |                  |  |
|    | Lck-486   | 122   | 85           | 0  | 0          | 0    | 0           | 15     | 28        | 236   | 631  | 184              |  |
|    | SART2-93  | 114   | 101          | 0  | 0          |      |             |        |           |       |      |                  |  |
| 38 | C-35      | 36429 | 35672        | 0  | <u>567</u> |      |             |        |           |       |      |                  |  |
|    | Lck-488   | 3059  | 3572         | 0  | 0          | 3527 | <u>6364</u> | 133    | <u>80</u> | 136   | 143  | 168 <sup>e</sup> |  |
|    | SART2-93  | 794   | 295          | 0  | <u>997</u> |      |             |        |           |       |      |                  |  |
|    | PSA-248   | 559   | <u>3464</u>  | 0  | 0          |      |             |        |           |       |      |                  |  |
| 39 | C-35      | 87    | <u>493</u>   | 0  | 0          |      |             |        |           |       |      |                  |  |
|    | PSA-248   | 541   | <u>10891</u> | 0  | 0          | 0    | <u>323</u>  | 36     | 243       | 118   | 1020 | 245 <sup>e</sup> |  |
|    | Lck-488   | 95    | 112          | 0  | 0          |      |             |        |           |       |      |                  |  |
|    | SART2-93  | 72    | 86           | 0  | <u>826</u> |      |             |        |           |       |      |                  |  |
| 40 | C-35      | 37761 | 37889        | 44 | 0          |      |             |        |           |       |      |                  |  |
|    | SART2-93  | 145   | 194          | 0  | 0          | 0    | <u>2350</u> | 4      | 7         | 2070  | 7510 | 189              |  |
|    | Lck-488   | 131   | 212          | 0  | 0          |      |             |        |           |       |      |                  |  |
|    | PSA-248   | 85    | <u>1029</u>  | 0  | 0          |      |             |        |           |       |      |                  |  |
| 41 | C-35      | 24642 | NA           | 0  | NA         |      |             |        |           |       |      |                  |  |
|    | SART2-93  | 340   | NA           | 0  | NA         | 0    | NA          | 103000 | NA        | 14500 | NA   | 117              |  |
|    | Lck-488   | 175   | NA           | 0  | NA         |      |             |        |           |       |      |                  |  |
|    | MRP3-1293 | 151   | NA           | 0  | NA         |      |             |        |           |       |      |                  |  |
| 42 | C-35      | 22949 | NA           | 0  | NA         |      |             |        |           |       |      |                  |  |
|    | Lck-488   | 337   | NA           | 0  | NA         | 0    | NA          | 898    | NA        | 171   | NA   | 77 <sup>e</sup>  |  |
|    | SART2-93  | 309   | NA           | 0  | NA         |      |             |        |           |       |      |                  |  |
|    | PSA-248   | 261   | NA           | 0  | NA         |      |             |        |           |       |      |                  |  |

Abbreviations: CTL, cytotoxic T lymphocytes; AFP,  $\alpha$ -fetoprotein; DCP, des- $\gamma$ -carboxy prothrombin, OS, overall survival; NA, not assessed

<sup>a</sup>Antigen peptides used for vaccination.

<sup>b</sup>Values indicate the fluorescence intensity unit (FIU) of plasma IgG reactive with the vaccine peptides before and after vaccination. The augmented IgG responses after vaccination are underlined.

<sup>c</sup>Values indicate the number of spots per  $10^5$  peripheral blood mononuclear cells (PBMCs) reactive with the vaccine peptides or CEF peptides in IFN- $\gamma$  ELISPOT assay before and after vaccination. The augmented T cell responses after vaccination are underlined.

<sup>d</sup>Tumor markers were measured before and after vaccination. The decreased values after vaccination are underlined.

<sup>e</sup>Patients were alive at the last follow-up.

**Supplementary Table 3. Humoral immune responses (IgG subclass)**

| Patient No. | Peptide <sup>a</sup> | IgG1 response <sup>b</sup> |              | IgG2 response <sup>b</sup> |              | IgG3 response <sup>b</sup> |              | IgG4 response <sup>b</sup> |            |
|-------------|----------------------|----------------------------|--------------|----------------------------|--------------|----------------------------|--------------|----------------------------|------------|
|             |                      | Before                     | After        | Before                     | After        | Before                     | After        | Before                     | After      |
| 1           | C-35                 | 14542                      | 14553        | 0                          | 0            | 22                         | 21           | 38                         | 38         |
|             | Lck-208              | 12                         | 0            | 0                          | 0            | 0                          | 0            | 0                          | 0          |
|             | PAP-213              | 0                          | <u>33</u>    | 0                          | 0            | 0                          | 0            | 0                          | 0          |
|             | PTHrP-102            | 0                          | 0            | 26                         | 27           | 10                         | 0            | 0                          | 0          |
| 2           | C-35                 | 23430                      | 22955        | 787                        | 594          | 48                         | 43           | 49                         | 40         |
|             | Lck-208              | 0                          | 0            | 0                          | 0            | 0                          | 0            | 0                          | 0          |
|             | PAP-213              | 20                         | 21           | 10                         | <u>20</u>    | 14                         | 18           | 0                          | 0          |
|             | PTHrP-102            | 0                          | 0            | 0                          | 0            | 0                          | 0            | 0                          | 0          |
| 3           | C-35                 | 22238                      | 23946        | 0                          | <u>14669</u> | 0                          | <u>10579</u> | 50                         | <u>230</u> |
|             | Lck-246              | 34                         | <u>14012</u> | 125                        | <u>2216</u>  | 22                         | <u>2802</u>  | 11                         | <u>115</u> |
|             | CypB-129             | 840                        | <u>4836</u>  | 0                          | 0            | 61                         | 89           | 13                         | 15         |
|             | WHSC2-141            | 56                         | <u>603</u>   | 69                         | 106          | 151                        | 170          | 51                         | 51         |
| 4           | C-35                 | 68                         | <u>231</u>   | 0                          | 0            | 0                          | <u>32</u>    | 0                          | 0          |
|             | Lck-208              | 109                        | 111          | 26                         | <u>54</u>    | 21                         | 24           | 0                          | <u>18</u>  |
|             | PSMA-624             | 34                         | 48           | 81                         | <u>1243</u>  | 0                          | 0            | 0                          | <u>16</u>  |
|             | PAP-213              | 33                         | <u>23399</u> | 11                         | <u>2390</u>  | 0                          | <u>7902</u>  | 0                          | <u>130</u> |
| 5           | C-35                 | 22912                      | 22836        | 112                        | <u>368</u>   | 133                        | <u>305</u>   | 60                         | 118        |
|             | CypB-129             | 132                        | 119          | 26                         | 29           | 29                         | 23           | 0                          | 0          |
|             | UBE2V-43             | 54                         | 49           | 25                         | 22           | 15                         | 13           | 0                          | 0          |
|             | HNRPL-140            | 19                         | 16           | 15                         | 20           | 74                         | 63           | 0                          | 0          |
| 6           | C-35                 | NA                         | NA           | NA                         | NA           | NA                         | NA           | NA                         | NA         |
|             | HNRPL-501            | NA                         | NA           | NA                         | NA           | NA                         | NA           | NA                         | NA         |
|             | ppMAPkkk-432         | NA                         | NA           | NA                         | NA           | NA                         | NA           | NA                         | NA         |
|             | WHSC2-103            | NA                         | NA           | NA                         | NA           | NA                         | NA           | NA                         | NA         |
| 7           | C-35                 | 2882                       | 2239         | 0                          | 0            | 11                         | 0            | 0                          | 0          |
|             | MRP3-1293            | 28                         | 42           | 21                         | 21           | 40                         | 38           | 17                         | 18         |
|             | Lck-488              | 73                         | 64           | 43                         | 37           | 124                        | 104          | 33                         | 25         |
|             | SART2-93             | 30                         | <u>89</u>    | 43                         | 65           | 71                         | 71           | 30                         | 31         |

|    |              |       |              |     |              |      |              |     |            |
|----|--------------|-------|--------------|-----|--------------|------|--------------|-----|------------|
| 8  | C-35         | 20625 | 22054        | 0   | 0            | 21   | 24           | 19  | 18         |
|    | SART2-93     | 61    | 63           | 73  | 92           | 57   | 60           | 103 | 101        |
|    | Lck-488      | 87    | <u>2164</u>  | 77  | 104          | 73   | 96           | 70  | 67         |
|    | MRP3-1293    | 44    | 48           | 14  | 24           | 45   | 41           | 0   | 0          |
| 9  | C-35         | 9528  | 18602        | 0   | <u>234</u>   | 0    | <u>104</u>   | 0   | 0          |
|    | UBE2V-85     | 3865  | <u>8973</u>  | 22  | <u>78</u>    | 0    | <u>69</u>    | 0   | 0          |
|    | Lck-422      | 4260  | 2754         | 0   | 0            | 0    | 0            | 0   | 0          |
|    | UBE2V-43     | 1594  | <u>22835</u> | 0   | <u>3062</u>  | 0    | <u>2303</u>  | 0   | <u>99</u>  |
| 10 | C-35         | 395   | <u>2344</u>  | 0   | <u>73</u>    | 0    | <u>895</u>   | 0   | 0          |
|    | PAP-213      | 582   | <u>21398</u> | 32  | <u>1120</u>  | 14   | <u>78</u>    | 0   | <u>385</u> |
|    | Lck-486      | 94    | <u>8608</u>  | 34  | <u>271</u>   | 81   | <u>7213</u>  | 12  | <u>102</u> |
|    | Lck-488      | 89    | <u>465</u>   | 85  | 82           | 101  | 104          | 35  | 23         |
| 11 | C-35         | NA    | NA           | NA  | NA           | NA   | NA           | NA  | NA         |
|    | WHSC2-103    | NA    | NA           | NA  | NA           | NA   | NA           | NA  | NA         |
|    | ppMAPkkk-432 | NA    | NA           | NA  | NA           | NA   | NA           | NA  | NA         |
|    | WHSC2-141    | NA    | NA           | NA  | NA           | NA   | NA           | NA  | NA         |
| 12 | C-35         | 10211 | 9397         | 555 | 634          | 610  | <u>2863</u>  | 0   | 0          |
|    | SART3-109    | 654   | 584          | 243 | 114          | 3052 | 2459         | 0   | 0          |
|    | Lck-90       | 68    | 101          | 88  | 98           | 40   | 47           | 0   | <u>10</u>  |
|    | HNRPL-501    | 46    | <u>636</u>   | 61  | 83           | 0    | <u>57</u>    | 0   | 0          |
| 13 | C-35         | 4357  | <u>15661</u> | 32  | <u>191</u>   | 57   | <u>277</u>   | 0   | 0          |
|    | PAP-213      | 13    | <u>23844</u> | 480 | <u>12524</u> | 0    | <u>14805</u> | 0   | <u>247</u> |
|    | SART2-93     | 22    | <u>139</u>   | 60  | 66           | 21   | <u>99</u>    | 0   | 0          |
|    | MRP3-1293    | 0     | <u>118</u>   | 0   | 18           | 0    | 0            | 0   | 0          |
| 14 | C-35         | 51    | <u>166</u>   | 0   | 0            | 0    | 0            | 0   | 0          |
|    | SART3-302    | 741   | <u>4726</u>  | 103 | 116          | 0    | 0            | 0   | 0          |
|    | Lck-246      | 70    | 54           | 73  | 58           | 0    | <u>24</u>    | 20  | 19         |
|    | SART3-309    | 18    | 15           | 52  | 43           | 0    | <u>13</u>    | 0   | 0          |
| 15 | C-35         | 22920 | 23069        | 47  | 40           | 0    | <u>17</u>    | 0   | 0          |
|    | SART3-109    | 1016  | 1372         | 27  | 29           | 12   | 22           | 0   | 0          |
|    | Lck-488      | 115   | 179          | 116 | 131          | 82   | 135          | 322 | 453        |

|    |           |       |              |      |              |     |             |     |             |
|----|-----------|-------|--------------|------|--------------|-----|-------------|-----|-------------|
|    | SART2-93  | 63    | <u>6405</u>  | 107  | <u>644</u>   | 32  | <u>135</u>  | 232 | 427         |
| 16 | C-35      | 17846 | 16162        | 17   | 12           | 17  | 17          | 62  | 50          |
|    | SART2-93  | 36    | 38           | 76   | 68           | 18  | 22          | 0   | 0           |
|    | Lck-486   | 19    | 23           | 61   | 65           | 0   | <u>13</u>   | 0   | 0           |
|    | EGF-R-800 | 39    | 46           | 30   | 35           | 0   | 0           | 0   | 0           |
| 17 | C-35      | 7234  | 6305         | 117  | 101          | 0   | <u>16</u>   | 0   | 0           |
|    | Lck-488   | 70    | 102          | 1455 | 1187         | 36  | 33          | 24  | 19          |
|    | SART2-161 | 0     | <u>14</u>    | 1097 | 793          | 0   | 0           | 0   | 0           |
|    | Lck-486   | 16    | <u>54</u>    | 1287 | 969          | 0   | <u>15</u>   | 0   | 0           |
| 18 | C-35      | 9553  | 13568        | 0    | <u>26</u>    | 0   | <u>15</u>   | 0   | 0           |
|    | SART3-302 | 3476  | <u>23874</u> | 13   | <u>3220</u>  | 0   | <u>199</u>  | 0   | <u>77</u>   |
|    | Lck-246   | 88    | 130          | 137  | 140          | 80  | 71          | 31  | 24          |
|    | UBE2V-43  | 104   | <u>23857</u> | 0    | <u>15539</u> | 0   | <u>1031</u> | 0   | <u>109</u>  |
| 19 | C-35      | 23874 | 23940        | 583  | <u>3016</u>  | 263 | 353         | 33  | <u>2551</u> |
|    | HNRPL-140 | 0     | 0            | 0    | 0            | 0   | 0           | 0   | 0           |
|    | WHSC2-103 | 0     | 0            | 0    | 0            | 17  | 16          | 15  | 13          |
|    | SART3-302 | 0     | 0            | 0    | 0            | 0   | 13          | 0   | 0           |
| 20 | C-35      | 0     | <u>12211</u> | 0    | 0            | 0   | 0           | 0   | 0           |
|    | WHSC2-103 | 0     | <u>61</u>    | 40   | 26           | 17  | 0           | 12  | 0           |
| 21 | C-35      | 17924 | 18036        | 45   | 53           | 11  | 15          | 0   | 0           |
|    | PSA-248   | 9124  | <u>24199</u> | 41   | <u>157</u>   | 39  | <u>652</u>  | 15  | <u>56</u>   |
|    | SART3-109 | 2527  | <u>8589</u>  | 3889 | 6330         | 23  | <u>100</u>  | 24  | 31          |
|    | SART2-93  | 68    | 71           | 413  | 453          | 51  | 52          | 26  | 21          |
| 22 | C-35      | NA    | NA           | NA   | NA           | NA  | NA          | NA  | NA          |
|    | MRP3-1293 | NA    | NA           | NA   | NA           | NA  | NA          | NA  | NA          |
|    | PAP-213   | NA    | NA           | NA   | NA           | NA  | NA          | NA  | NA          |
|    | SART2-93  | NA    | NA           | NA   | NA           | NA  | NA          | NA  | NA          |
| 23 | C-35      | 3376  | 3192         | 0    | 0            | 0   | 0           | 81  | 92          |
|    | Lck-488   | 5049  | 5073         | 79   | 93           | 114 | 134         | 0   | 0           |
|    | MRP3-1293 | 14    | <u>42</u>    | 718  | 1405         | 0   | 0           | 0   | 0           |
|    | SART2-93  | 44    | 50           | 665  | 607          | 22  | 27          | 11  | 12          |

|    |              |       |             |      |             |      |             |     |            |
|----|--------------|-------|-------------|------|-------------|------|-------------|-----|------------|
| 24 | C-35         | 24030 | 24211       | 1842 | 2668        | 129  | 187         | 30  | 42         |
|    | SART3-302    | 20448 | 20872       | 104  | 184         | 110  | 152         | 14  | 22         |
|    | HNRPL-501    | 176   | <u>409</u>  | 59   | 69          | 81   | <u>189</u>  | 32  | 48         |
|    | WHSC2-103    | 19    | 19          | 56   | 61          | 30   | 49          | 0   | 0          |
| 25 | C-35         | 6393  | 11395       | 0    | <u>176</u>  | 20   | <u>91</u>   | 0   | <u>31</u>  |
|    | SART3-109    | 4975  | 5071        | 34   | 55          | 4093 | 3865        | 0   | 0          |
|    | Lck-486      | 42    | 56          | 0    | 0           | 553  | 587         | 0   | 0          |
|    | SART2-93     | 57    | <u>7873</u> | 127  | <u>3982</u> | 90   | 148         | 120 | 142        |
| 26 | C-35         | 5764  | 3906        | 0    | 0           | 18   | 14          | 0   | 0          |
|    | SART3-734    | 735   | 873         | 96   | 120         | 65   | 35          | 25  | 11         |
| 27 | C-35         | 440   | 465         | 29   | 30          | 0    | <u>10</u>   | 0   | 0          |
|    | Lck-246      | 54    | 61          | 91   | 91          | 41   | 42          | 0   | <u>11</u>  |
|    | ppMAPkkk-432 | 12    | 11          | 36   | 33          | 0    | 0           | 0   | 0          |
|    | WHSC2-103    | 23    | 27          | 30   | 29          | 83   | 87          | 0   | 0          |
| 28 | C-35         | 21423 | 16081       | 0    | 0           | 13   | <u>199</u>  | 11  | 0          |
|    | SART3-511    | 211   | 142         | 30   | 33          | 23   | 21          | 11  | 0          |
|    | SART3-734    | 180   | 147         | 13   | 0           | 85   | 54          | 26  | 20         |
| 29 | C-35         | NA    | NA          | NA   | NA          | NA   | NA          | NA  | NA         |
|    | SART3-109    | NA    | NA          | NA   | NA          | NA   | NA          | NA  | NA         |
|    | Lck-488      | NA    | NA          | NA   | NA          | NA   | NA          | NA  | NA         |
|    | SART2-93     | NA    | NA          | NA   | NA          | NA   | NA          | NA  | NA         |
| 30 | C-35         | 23354 | 24117       | 11   | <u>3017</u> | 238  | <u>7071</u> | 73  | <u>894</u> |
|    | SART2-93     | 55    | 66          | 89   | 100         | 57   | 66          | 52  | 49         |
|    | SART3-109    | 79    | <u>1299</u> | 0    | <u>35</u>   | 0    | <u>38</u>   | 0   | 0          |
|    | Lck-488      | 84    | 146         | 108  | 115         | 78   | 76          | 74  | 53         |
| 31 | C-35         | 11578 | 12255       | 30   | 15          | 12   | 0           | 0   | 0          |
|    | WHSC2-141    | 0     | 0           | 20   | <u>42</u>   | 20   | <u>63</u>   | 0   | <u>11</u>  |
|    | CypB-129     | 0     | 0           | 0    | 0           | 0    | 0           | 0   | 0          |
|    | Lck-246      | 0     | 0           | 0    | 0           | 0    | 0           | 0   | 0          |
| 32 | C-35         | 23986 | 24058       | 5701 | 6048        | 143  | 158         | 40  | 43         |
|    | Lck-488      | 61    | <u>204</u>  | 73   | 87          | 75   | 98          | 15  | 28         |

|    |              |       |              |       |              |       |              |     |            |
|----|--------------|-------|--------------|-------|--------------|-------|--------------|-----|------------|
|    | PAP-213      | 50    | <u>23097</u> | 41    | <u>1404</u>  | 19    | <u>4307</u>  | 0   | <u>64</u>  |
|    | SART2-93     | 49    | <u>170</u>   | 76    | 66           | 45    | 83           | 21  | <u>44</u>  |
| 33 | C-35         | 12735 | 11094        | 0     | 0            | 0     | 0            | 0   | 0          |
|    | MRP3-1293    | 131   | 57           | 13    | 0            | 19    | 23           | 74  | 72         |
|    | SART2-93     | 36    | 29           | 71    | 71           | 80    | 69           | 51  | 43         |
|    | PSA-248      | 23    | 29           | 0     | 0            | 0     | 0            | 0   | 0          |
| 34 | C-35         | 23382 | 23208        | 1072  | 1073         | 23573 | 23635        | 100 | 83         |
|    | ppMAPkkk-432 | 0     | 0            | 0     | <u>13</u>    | 162   | 149          | 0   | 0          |
|    | Lck-246      | 42    | 55           | 57    | 48           | 40    | 47           | 19  | 17         |
|    | HNRPL-140    | 131   | 137          | 27    | 32           | 11    | 13           | 0   | 0          |
| 35 | C-35         | 18120 | 17355        | 0     | 0            | 0     | 0            | 12  | 14         |
|    | Lck-90       | 486   | 368          | 79    | 85           | 47    | 33           | 31  | 18         |
|    | Lck-449      | 45    | 40           | 237   | 271          | 45    | 54           | 31  | 20         |
|    | SART3-734    | 28    | 26           | 177   | 216          | 47    | 45           | 30  | 20         |
| 36 | C-35         | 12233 | 20374        | 71    | <u>149</u>   | 21    | <u>624</u>   | 0   | 0          |
|    | PAP-213      | 306   | <u>24592</u> | 18    | <u>18041</u> | 14    | <u>10662</u> | 0   | <u>184</u> |
|    | SART2-93     | 652   | 691          | 80    | 86           | 59    | 58           | 20  | 20         |
|    | PSMA-624     | 45    | <u>851</u>   | 11    | 15           | 147   | 180          | 11  | 11         |
| 37 | C-35         | 24640 | 24636        | 121   | <u>446</u>   | 2151  | 2569         | 33  | <u>98</u>  |
|    | Lck-488      | 68    | 54           | 58    | 69           | 286   | 220          | 0   | 0          |
|    | Lck-486      | 17    | 16           | 0     | 0            | 31    | 27           | 0   | 0          |
|    | SART2-93     | 24    | 29           | 62    | 58           | 66    | 60           | 0   | 0          |
| 38 | C-35         | 22248 | 18149        | 0     | <u>15</u>    | 106   | 27           | 431 | 77         |
|    | Lck-488      | 4481  | 4064         | 133   | 217          | 653   | 687          | 90  | 45         |
|    | SART2-93     | 0     | <u>127</u>   | 25    | <u>110</u>   | 94    | 83           | 14  | 0          |
|    | PSA-248      | 0     | <u>1835</u>  | 0     | <u>30</u>    | 19    | 35           | 0   | 0          |
| 39 | C-35         | 0     | <u>230</u>   | 0     | 0            | 0     | 0            | 0   | <u>17</u>  |
|    | PSA-248      | 254   | <u>10053</u> | 0     | <u>95</u>    | 0     | 0            | 0   | 0          |
|    | Lck-488      | 42    | 56           | 100   | 88           | 43    | 45           | 16  | <u>38</u>  |
|    | SART2-93     | 33    | 39           | 72    | 79           | 35    | 38           | 20  | <u>46</u>  |
| 40 | C-35         | 24215 | 24183        | 23824 | 23443        | 178   | 143          | 146 | 145        |

|    |           |    |           |     |     |     |            |    |    |
|----|-----------|----|-----------|-----|-----|-----|------------|----|----|
|    | SART2-93  | 43 | 48        | 90  | 74  | 52  | 50         | 14 | 15 |
|    | Lck-488   | 69 | 94        | 111 | 119 | 116 | 110        | 27 | 26 |
|    | PSA-248   | 0  | <u>26</u> | 0   | 0   | 0   | <u>368</u> | 0  | 0  |
| 41 | C-35      | NA | NA        | NA  | NA  | NA  | NA         | NA | NA |
|    | SART2-93  | NA | NA        | NA  | NA  | NA  | NA         | NA | NA |
|    | Lck-488   | NA | NA        | NA  | NA  | NA  | NA         | NA | NA |
|    | MRP3-1293 | NA | NA        | NA  | NA  | NA  | NA         | NA | NA |
| 42 | C-35      | NA | NA        | NA  | NA  | NA  | NA         | NA | NA |
|    | Lck-488   | NA | NA        | NA  | NA  | NA  | NA         | NA | NA |
|    | SART2-93  | NA | NA        | NA  | NA  | NA  | NA         | NA | NA |
|    | PSA-248   | NA | NA        | NA  | NA  | NA  | NA         | NA | NA |

Abbreviation: NA, not assessed

<sup>a</sup>Antigen peptides used for vaccination.

<sup>b</sup>Values indicate the fluorescence intensity unit (FIU) of plasma IgG subclasses reactive with the vaccine peptides before and after vaccination. The augmented IgG responses after vaccination are underlined.
